# Supplementary material
Source: publisher figshare collection journal article supplement (https://karger.figshare.com/ndownloader/files/8716114)
Supplement: Supplementary file 1 [file 8716114]

**Supplemental Table 1: Odds ratios and 95% confidence intervals of rapid estimated glomerular filtration rate (eGFR) decline (n=1802; 80 cases / 1722 controls), defined using eGFR estimated using the CKD-EPI equation (eGFR decline≥3mL/min/1.73m2 per year and incident eGFR<60mL/min/1.73m2), by lifestyle exposures.**

|  | Model 1† |  | Model 2* |  |
| --- | --- | --- | --- | --- |
|  | OR (95% CI) | p | OR (95% CI) | p |
| Dietary Guidelines Adherence Index |  |  |  |  |
| Quartile 1 (Q1) - lowest quality | 1 (ref) | -- | 1 (ref) | -- |
| Q2 | 0.85 (0.46-1.58) | 0.61 | 0.85 (0.45-1.60) | 0.62 |
| Q3 | 0.57 (0.29-1.11) | 0.10 | 0.57 (0.29-1.13) | 0.11 |
| Q4 - highest quality | 0.49 (0.24-0.99) | 0.05 | 0.52 (0.25-1.06) | 0.07 |
| *p*-trend |  | 0.02 |  | 0.04 |
| Physical Activity Index |  |  |  |  |
| Q1 - lowest activity | 1 (ref) | -- | 1 (ref) | -- |
| Q2 | 1.01 (0.53-1.93) | 0.97 | 1.11 (0.58-2.13) | 0.76 |
| Q3 | 0.80 (0.41-1.57) | 0.52 | 0.82 (0.41-1.63) | 0.57 |
| Q4 - highest activity | 0.82 (0.42-1.58) | 0.55 | 0.85 (0.43-1.67) | 0.63 |
| *p*-trend |  | 0.43 |  | 0.46 |
| Current Smoker |  |  |  |  |
| No | 1 (ref) | -- | 1 (ref) | -- |
| Yes | 1.46 (0.71-3.02) | 0.30 | 1.44 (0.69-3.02) | 0.34 |
| Alcohol Consumption |  |  |  |  |
| None | 1 (ref) | -- | 1 (ref) | -- |
| Low-to-moderate | 0.86 (0.51-1.43) | 0.55 | 1.02 (0.61-1.74) | 0.93 |
| High | 0.79 (0.39-1.59) | 0.50 | 0.89 (0.44-1.83) | 0.75 |

† Adjusted for other listed lifestyle factors, age, sex, and baseline eGFR

* Adjusted for other listed lifestyle factors, age, sex, baseline eGFR, BMI, hypertension, diabetes, and dipstick proteinuria
